# Supplementary material for: Synthesis, structures, adsorption behaviour and magnetic properties of a new family of polynuclear iron clusters
Source: Royal Society of Chemistry journal article supplement (doi:10.1039/c000126k), 2010-01-01
Supplement: c000126k.pdf [file c000126k.pdf]

**The Coordination Chemistry of 1,10-Phenanthroline-2,9-dicarbaldehyde dioxime. 1.  
Synthesis, Structures, Adsorption Behaviour and Magnetic Properties of a New  
Family of Polynuclear Iron Clusters**

Yan-Li Miao,<sup>a,b</sup> Jun-Liang Liu,<sup>a</sup> Zhuo-Jia Lin,<sup>a</sup> Yong-Cong Ou,<sup>a</sup> Ji-Dong Leng,<sup>a</sup> and Ming-Liang Tong\*<sup>a,c</sup>

<sup>a</sup> *Key Laboratory of Bioinorganic and Synthetic Chemistry of Ministry of Education / State Key Laboratory of Optoelectronic Materials and Technologies, School of Chemistry and Chemical Engineering, Sun Yat-Sen University, Guangzhou 510275, China. E-mail: [tongml@mail.sysu.edu.cn](mailto:tongml@mail.sysu.edu.cn)*

<sup>b</sup> *College of Science, Guangdong Ocean University, Zhanjiang 524088, P. R. China*

<sup>c</sup> *State Key Laboratory of Structural Chemistry, Fujian Institute of Research on the Structure of Matter, Chinese Academy of Sciences, Fuzhou 350002, P. R. China*

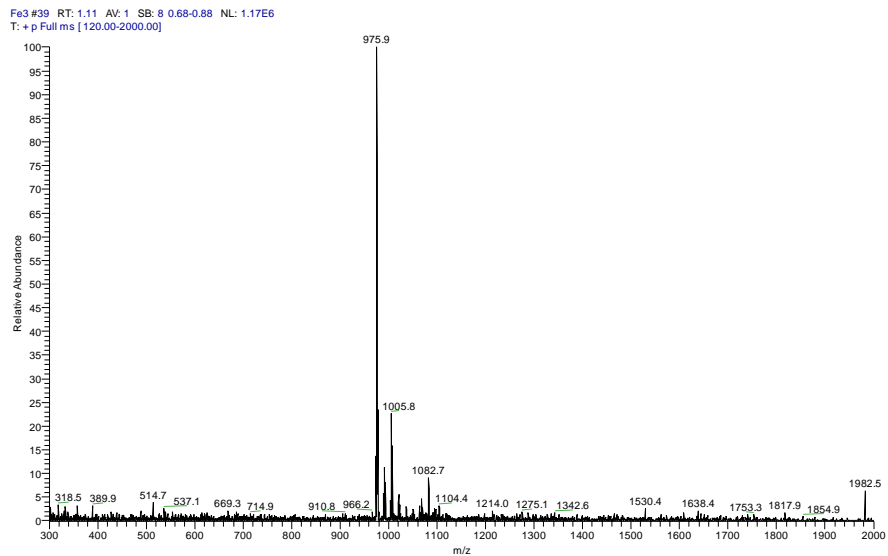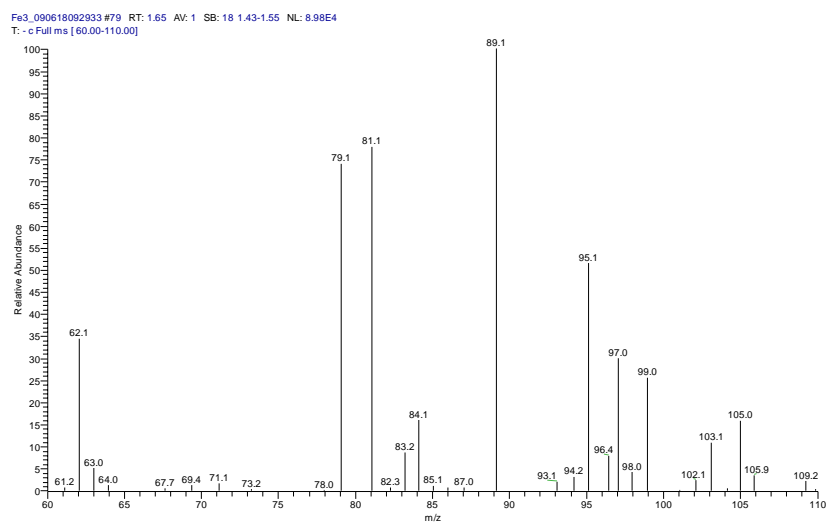

Figure S1. ESI-MS Spectra for 2.

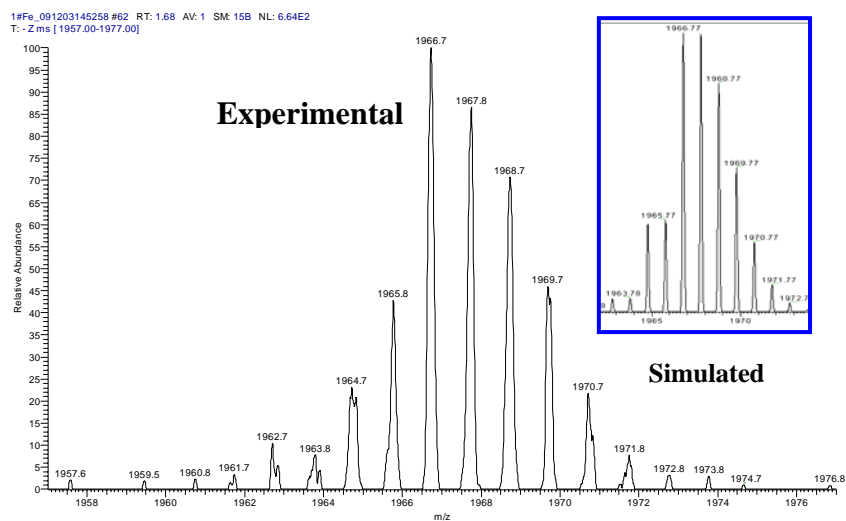

Figure S2. ESI-MS Spectra for 5.

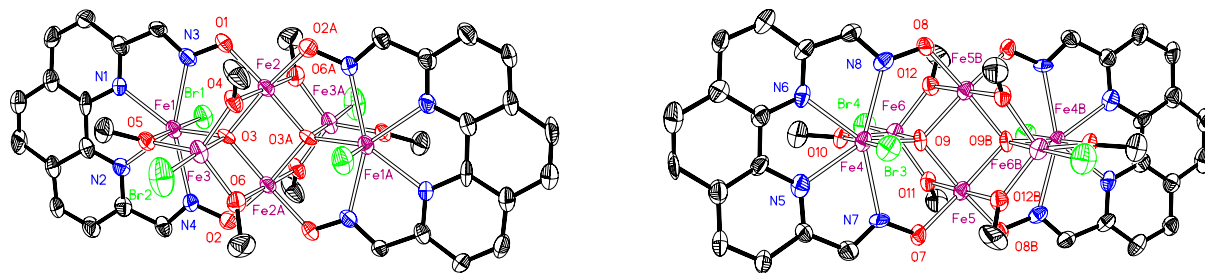

**Figure S3.** Perspective views of the molecular structures in **4** (H atoms and solvent molecules are omitted for clarity) with thermal ellipsoids at 30% probability.

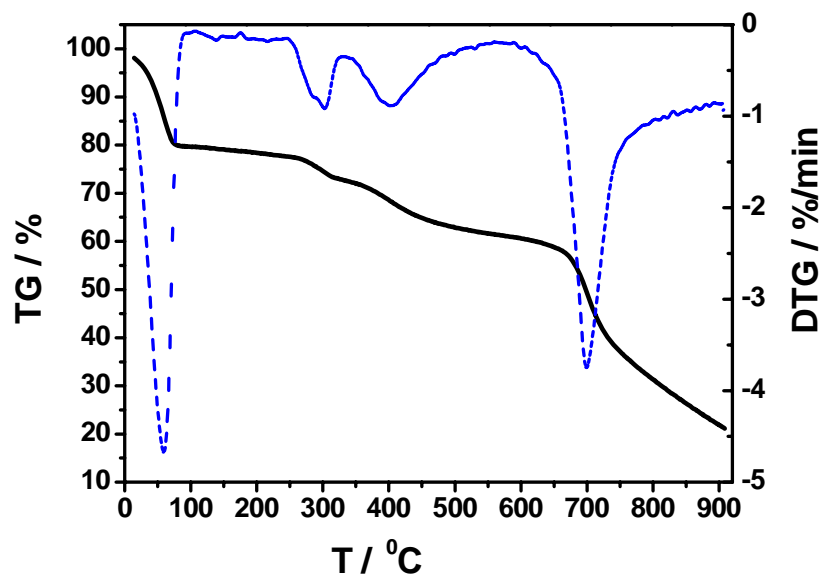

**Figure S4.** TG curve of **2** under  $N_2$ .

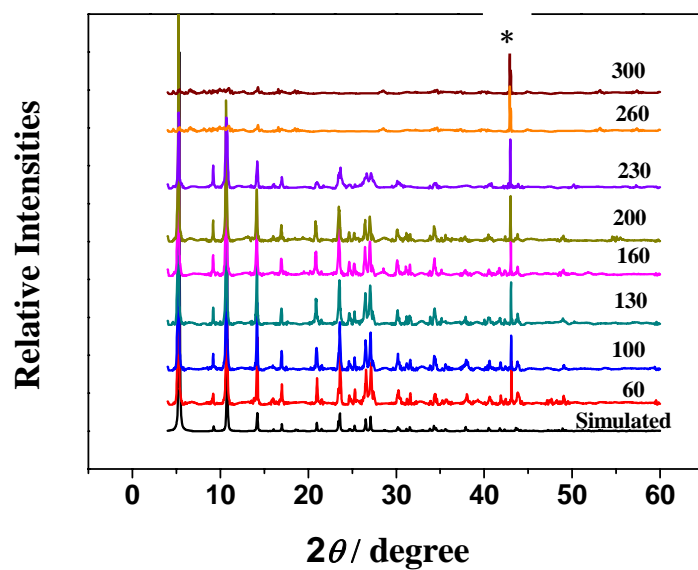

**Figure S5.** Variable-temperature X-ray powder diffraction (VTXRPD) of **2** under N<sub>2</sub> at standard atmospheric pressure from 60 °C to 300 °C. (\* marks the diffraction peak of back ground)

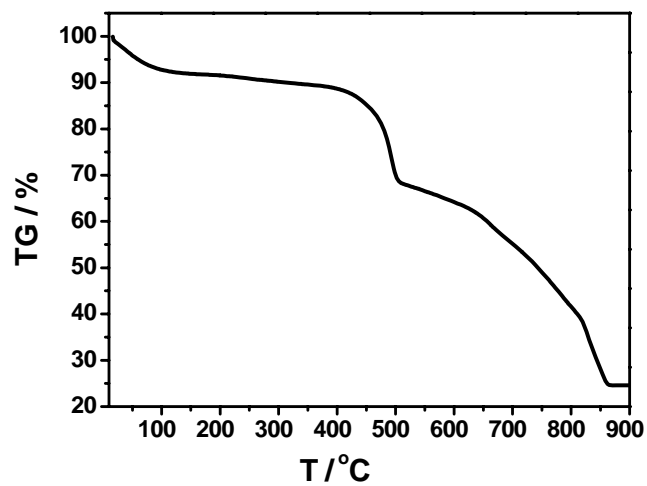

**Figure S6.** TG curve of **5** under N<sub>2</sub>.

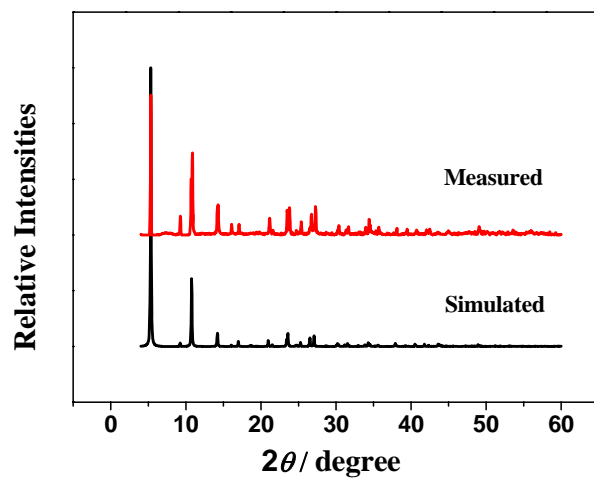

Figure S7. XRD patterns of 2

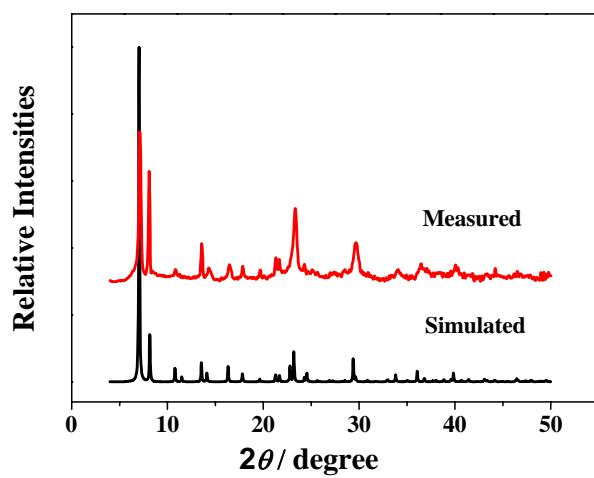

Figure S8. XRD patterns of 5

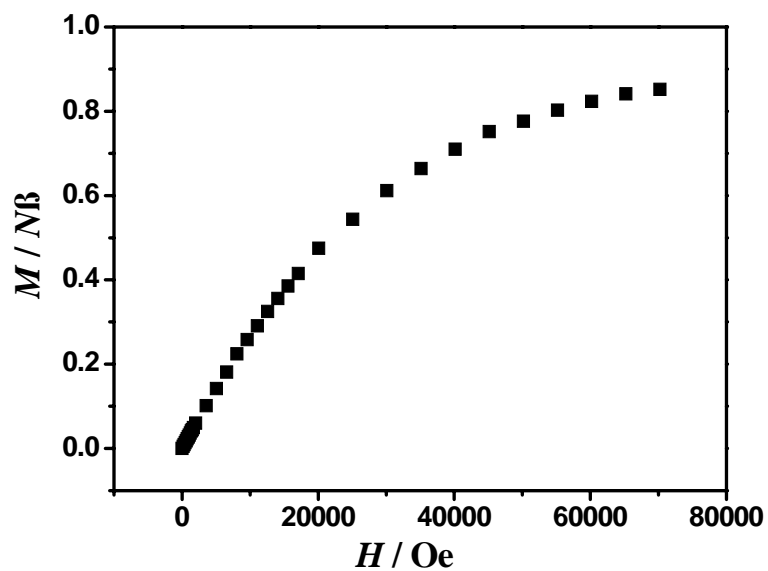

Figure S9. Field dependence of magnetization for **2** at  $T = 2$  K.

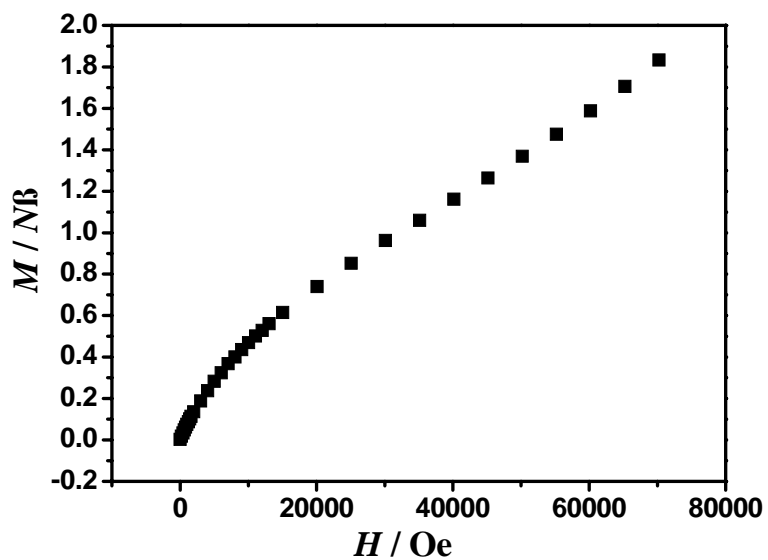

Figure S10. Field dependence of magnetization for **5** at  $T = 2$  K.

**Table S1.** Selected bond lengths (Å) and angles (°) for **1** and **2**.

|                   | <b>1</b>   | <b>2</b>   |                   | <b>1</b>   | <b>2</b>   |
|-------------------|------------|------------|-------------------|------------|------------|
| Fe(1)-O(1)        | 1.9064(9)  | 1.9085(5)  | Fe(1)-N(2c)       | 2.353(3)   | 2.366(2)   |
| Fe(1)-O(2a)       | 1.988(3)   | 1.9993(18) | Fe(1)-N(2)        | 2.353(3)   | 2.366(2)   |
| Fe(1)-O(2b)       | 1.988(3)   | 1.9993(19) | O(1)-Fe(1b)       | 1.9064(9)  | 1.9085(5)  |
| Fe(1)-N(1c)       | 2.243(4)   | 2.250(2)   | O(1)-Fe(1d)       | 1.9064(9)  | 1.9085(5)  |
| Fe(1)-N(1)        | 2.243(4)   | 2.250(2)   | O(2)-Fe(1d)       | 1.988(3)   | 1.9993(18) |
| O(1)-Fe(1)-O(2a)  | 90.59(8)   | 90.69(5)   | O(2a)-Fe(1)-N(2c) | 93.29(12)  | 93.07(8)   |
| O(1)-Fe(1)-O(2b)  | 90.59(8)   | 90.69(5)   | O(2b)-Fe(1)-N(2c) | 86.96(11)  | 87.22(8)   |
| O(2a)-Fe(1)-O(2b) | 178.83(17) | 178.62(11) | N(1c)-Fe(1)-N(2c) | 67.48(12)  | 67.39(9)   |
| O(1)-Fe(1)-N(1c)  | 144.71(9)  | 144.63(5)  | N(1)-Fe(1)-N(2c)  | 137.42(13) | 137.50(8)  |
| O(2a)-Fe(1)-N(1c) | 87.28(11)  | 87.14(8)   | O(1)-Fe(1)-N(2)   | 77.50(9)   | 77.51(6)   |
| O(2b)-Fe(1)-N(1c) | 91.77(12)  | 91.74(8)   | O(2a)-Fe(1)-N(2)  | 86.96(11)  | 87.22(8)   |
| O(1)-Fe(1)-N(1)   | 144.71(9)  | 144.63(5)  | O(2b)-Fe(1)-N(2)  | 93.29(11)  | 93.07(8)   |
| O(2a)-Fe(1)-N(1)  | 91.77(12)  | 91.74(8)   | N(1c)-Fe(1)-N(2)  | 137.42(13) | 137.50(8)  |
| O(2b)-Fe(1)-N(1)  | 87.28(11)  | 87.14(8)   | N(1)-Fe(1)-N(2)   | 67.48(12)  | 67.38(8)   |
| N(1c)-Fe(1)-N(1)  | 70.57(17)  | 70.74(11)  | N(2c)-Fe(1)-N(2)  | 155.00(17) | 155.02(11) |
| O(1)-Fe(1)-N(2c)  | 77.50(9)   | 77.51(6)   |                   |            |            |

Symmetry codes for **1** and **2**: a) x, x-y+1, -z+3/2; b) -x+y, -x+1, z; c) -y+1, -x+1, -z+3/2; d) -y+1, x-y+1, z.

**Table S2.** Selected bond lengths (Å) and angles (°) for **3**.

|             |          |             |          |
|-------------|----------|-------------|----------|
| Fe(1)-O(3)  | 1.950(4) | Fe(4)-O(9)  | 1.956(4) |
| Fe(1)-O(5)  | 2.050(4) | Fe(4)-O(10) | 2.037(4) |
| Fe(1)-N(2)  | 2.270(5) | Fe(4)-N(6)  | 2.246(5) |
| Fe(1)-N(1)  | 2.231(6) | Fe(4)-Cl(3) | 2.270(2) |
| Fe(1)-Cl(1) | 2.260(2) | Fe(4)-N(5)  | 2.242(6) |
| Fe(1)-N(4)  | 2.426(6) | Fe(4)-N(8)  | 2.385(6) |
| Fe(1)-N(3)  | 2.352(6) | Fe(4)-N(7)  | 2.372(6) |
| Fe(2)-O(1)  | 1.966(5) | Fe(5)-O(8b) | 1.963(4) |
| Fe(2)-O(2a) | 1.979(5) | Fe(5)-O(7)  | 1.967(4) |
| Fe(2)-O(3a) | 2.004(4) | Fe(5)-O(9)  | 2.019(4) |
| Fe(2)-O(3)  | 2.021(4) | Fe(5)-O(9b) | 2.020(4) |
| Fe(2)-O(4)  | 2.055(5) | Fe(5)-O(11) | 2.068(4) |

|                   |            |                   |            |
|-------------------|------------|-------------------|------------|
| Fe(2)-O(6)        | 2.046(5)   | Fe(5)-O(12b)      | 1.879(4)   |
| Fe(3)-O(4)        | 1.885(5)   | Fe(6)-O(11)       | 1.903(4)   |
| Fe(3)-O(6a)       | 1.880(5)   | Fe(6)-O(12)       | 1.879(4)   |
| Fe(3)-O(5)        | 1.935(4)   | Fe(6)-O(10)       | 1.938(4)   |
| Fe(3)-O(3)        | 2.119(4)   | Fe(6)-O(9)        | 2.125(4)   |
| Fe(3)-Cl(2)       | 2.252(2)   | Fe(6)-Cl(4)       | 2.272(2)   |
| O(3)-Fe(1)-O(5)   | 80.08(17)  | O(9)-Fe(4)-O(10)  | 79.95(16)  |
| O(3)-Fe(1)-N(2)   | 141.0(2)   | O(9)-Fe(4)-N(6)   | 141.6(2)   |
| O(5)-Fe(1)-N(2)   | 86.89(18)  | O(10)-Fe(4)-N(6)  | 87.17(18)  |
| O(3)-Fe(1)-N(1)   | 144.8(2)   | O(9)-Fe(4)-Cl(3)  | 103.12(12) |
| O(5)-Fe(1)-N(1)   | 87.4(2)    | O(10)-Fe(4)-Cl(3) | 176.83(13) |
| N(2)-Fe(1)-N(1)   | 69.9(2)    | N(6)-Fe(4)-Cl(3)  | 90.79(15)  |
| O(3)-Fe(1)-Cl(1)  | 99.48(13)  | O(9)-Fe(4)-N(5)   | 142.9(2)   |
| O(5)-Fe(1)-Cl(1)  | 179.53(13) | O(10)-Fe(4)-N(5)  | 88.88(19)  |
| N(2)-Fe(1)-Cl(1)  | 93.55(15)  | N(6)-Fe(4)-N(5)   | 70.2(2)    |
| N(1)-Fe(1)-Cl(1)  | 92.94(16)  | Cl(3)-Fe(4)-N(5)  | 93.65(14)  |
| O(3)-Fe(1)-N(4)   | 76.38(18)  | O(9)-Fe(4)-N(8)   | 78.31(17)  |
| O(5)-Fe(1)-N(4)   | 91.45(19)  | O(10)-Fe(4)-N(8)  | 88.89(18)  |
| N(2)-Fe(1)-N(4)   | 67.3(2)    | N(6)-Fe(4)-N(8)   | 67.3(2)    |
| N(1)-Fe(1)-N(4)   | 137.1(2)   | Cl(3)-Fe(4)-N(8)  | 90.93(14)  |
| Cl(1)-Fe(1)-N(4)  | 88.57(15)  | N(5)-Fe(4)-N(8)   | 139.02(19) |
| O(3)-Fe(1)-N(3)   | 78.35(19)  | O(9)-Fe(4)-N(7)   | 77.35(17)  |
| O(5)-Fe(1)-N(3)   | 78.35(19)  | O(10)-Fe(4)-N(7)  | 90.53(18)  |
| N(2)-Fe(1)-N(3)   | 138.4(2)   | N(6)-Fe(4)-N(7)   | 139.2(2)   |
| N(1)-Fe(1)-N(3)   | 68.6(2)    | Cl(3)-Fe(4)-N(7)  | 89.43(14)  |
| Cl(1)-Fe(1)-N(3)  | 90.78(16)  | N(5)-Fe(4)-N(7)   | 67.4(2)    |
| N(4)-Fe(1)-N(3)   | 154.3(2)   | N(8)-Fe(4)-N(7)   | 153.55(18) |
| O(1)-Fe(2)-O(2a)  | 97.0(2)    | O(8b)-Fe(5)-O(7)  | 97.42(19)  |
| O(1)-Fe(2)-O(3a)  | 164.31(19) | O(8b)-Fe(5)-O(9)  | 165.57(18) |
| O(2a)-Fe(2)-O(3a) | 92.96(18)  | O(7)-Fe(5)-O(9)   | 91.21(17)  |
| O(1)-Fe(2)-O(3)   | 92.13(17)  | O(8b)-Fe(5)-O(9b) | 92.17(17)  |
| O(2a)-Fe(2)-O(3)  | 165.31(19) | O(7)-Fe(5)-O(9b)  | 165.32(17) |
| O(3a)-Fe(2)-O(3)  | 80.71(17)  | O(9)-Fe(5)-O(9b)  | 81.99(16)  |



|                   |            |                    |            |
|-------------------|------------|--------------------|------------|
| O(1)-Fe(2)-O(4)   | 91.8(2)    | O(8b)-Fe(5)-O(11)  | 89.21(18)  |
| O(2a)-Fe(2)-O(4)  | 88.98(19)  | O(7)-Fe(5)-O(11)   | 91.19(19)  |
| O(3a)-Fe(2)-O(4)  | 100.49(19) | O(9)-Fe(5)-O(11)   | 79.03(16)  |
| O(3)-Fe(2)-O(4)   | 79.26(17)  | O(9b)-Fe(5)-O(11)  | 100.86(18) |
| O(1)-Fe(2)-O(6)   | 89.2(2)    | O(8b)-Fe(5)-O(12b) | 89.92(19)  |
| O(2a)-Fe(2)-O(6)  | 89.8(2)    | O(7)-Fe(5)-O(12b)  | 89.26(19)  |
| O(3a)-Fe(2)-O(6)  | 78.70(18)  | O(9)-Fe(5)-O(12b)  | 101.77(17) |
| O(3)-Fe(2)-O(6)   | 101.77(17) | O(9b)-Fe(5)-O(12b) | 78.83(17)  |
| O(4)-Fe(2)-O(6)   | 178.53(19) | O(11)-Fe(5)-O(12b) | 179.07(17) |
| O(4)-Fe(3)-O(6a)  | 109.4(2)   | O(11)-Fe(6)-O(12)  | 108.0(2)   |
| O(4)-Fe(3)-O(5)   | 118.4(2)   | O(11)-Fe(6)-O(10)  | 119.9(2)   |
| O(6a)-Fe(3)-O(5)  | 122.6(2)   | O(12)-Fe(6)-O(10)  | 122.3(2)   |
| O(4)-Fe(3)-O(3)   | 80.74(17)  | O(11)-Fe(6)-O(9)   | 80.23(16)  |
| O(6a)-Fe(3)-O(3)  | 79.65(18)  | O(12)-Fe(6)-O(9)   | 80.25(17)  |
| O(5)-Fe(3)-O(3)   | 78.70(17)  | O(10)-Fe(6)-O(9)   | 78.18(16)  |
| O(4)-Fe(3)-Cl(2)  | 104.22(16) | O(11)-Fe(6)-Cl(4)  | 101.45(14) |
| O(6a)-Fe(3)-Cl(2) | 101.55(13) | O(12)-Fe(6)-Cl(4)  | 101.99(14) |
| O(5)-Fe(3)-Cl(2)  | 97.94(14)  | O(10)-Fe(6)-Cl(4)  | 98.37(13)  |
| O(3)-Fe(3)-Cl(2)  | 174.97(13) | O(9)-Fe(6)-Cl(4)   | 176.53(12) |

Symmetry codes for **3**: a) -x, -y, -z; b) -x-1, -y-1, -z-1.

**Table S3.** Selected bond lengths (Å) and angles (°) for **4**.

|             |           |             |           |
|-------------|-----------|-------------|-----------|
| Fe(1)-O(3)  | 1.966(9)  | Fe(2)-O(1)  | 1.952(10) |
| Fe(1)-O(5)  | 2.060(11) | Fe(2)-O(2a) | 1.960(10) |
| Fe(1)-N(1)  | 2.257(11) | Fe(2)-O(3a) | 1.994(8)  |
| Fe(1)-N(2)  | 2.274(12) | Fe(2)-O(3)  | 2.018(8)  |
| Fe(1)-N(3)  | 2.378(13) | Fe(2)-O(6a) | 2.035(10) |
| Fe(1)-N(4)  | 2.418(11) | Fe(2)-O(4)  | 2.073(11) |
| Fe(1)-Br(1) | 2.429(3)  | Fe(3)-O(5)  | 1.933(10) |
| Fe(3)-O(3)  | 2.119(8)  | Fe(3)-O(6)  | 1.887(10) |
| Fe(3)-O(4)  | 1.857(10) | Fe(3)-Br(2) | 2.366(3)  |
| Fe(4)-O(9)  | 1.954(9)  | Fe(5)-O(8b) | 1.943(10) |
| Fe(4)-O(10) | 2.038(9)  | Fe(5)-O(7)  | 1.944(9)  |
| Fe(4)-N(6)  | 2.245(12) | Fe(5)-O(9b) | 2.028(10) |

|                  |           |                   |           |
|------------------|-----------|-------------------|-----------|
| Fe(4)-N(5)       | 2.252(12) | Fe(5)-O(9)        | 2.031(8)  |
| Fe(4)-N(7)       | 2.400(10) | Fe(5)-O(11)       | 2.033(10) |
| Fe(4)-N(8)       | 2.415(11) | Fe(5)-O(12b)      | 2.054(10) |
| Fe(4)-Br(3)      | 2.428(3)  | Fe(6)-O(11)       | 1.885(10) |
| Fe(6)-O(10)      | 1.933(10) | Fe(6)-Br(4)       | 2.408(3)  |
| Fe(6)-O(9)       | 2.106(9)  | Fe(6)-O(12)       | 1.886(9)  |
| O(3)-Fe(1)-O(5)  | 80.2(4)   | O(2a)-Fe(2)-O(3a) | 93.2(4)   |
| O(3)-Fe(1)-N(1)  | 144.6(4)  | O(1)-Fe(2)-O(3)   | 92.6(4)   |
| O(5)-Fe(1)-N(1)  | 87.8(4)   | O(2a)-Fe(2)-O(3)  | 166.1(4)  |
| O(3)-Fe(1)-N(2)  | 140.9(4)  | O(3a)-Fe(2)-O(3)  | 80.3(4)   |
| O(5)-Fe(1)-N(2)  | 87.5(4)   | O(1)-Fe(2)-O(6a)  | 89.1(4)   |
| N(1)-Fe(1)-N(2)  | 70.6(4)   | O(2a)-Fe(2)-O(6a) | 89.4(5)   |
| O(3)-Fe(1)-N(3)  | 78.4(4)   | O(3a)-Fe(2)-O(6a) | 78.5(3)   |
| O(5)-Fe(1)-N(3)  | 89.1(4)   | O(3)-Fe(2)-O(6a)  | 101.1(4)  |
| N(1)-Fe(1)-N(3)  | 68.2(4)   | O(1)-Fe(2)-O(4)   | 91.3(5)   |
| N(2)-Fe(1)-N(3)  | 138.8(4)  | O(2a)-Fe(2)-O(4)  | 90.5(4)   |
| O(3)-Fe(1)-N(4)  | 76.3(4)   | O(3a)-Fe(2)-O(4)  | 101.0(4)  |
| O(5)-Fe(1)-N(4)  | 91.1(4)   | O(3)-Fe(2)-O(4)   | 78.9(4)   |
| N(1)-Fe(1)-N(4)  | 137.5(4)  | O(6a)-Fe(2)-O(4)  | 179.6(4)  |
| N(2)-Fe(1)-N(4)  | 66.9(4)   | O(4)-Fe(3)-O(6)   | 109.5(5)  |
| N(3)-Fe(1)-N(4)  | 154.2(4)  | O(4)-Fe(3)-O(5)   | 118.3(5)  |
| O(3)-Fe(1)-Br(1) | 99.3(2)   | O(6)-Fe(3)-O(5)   | 123.0(4)  |
| O(5)-Fe(1)-Br(1) | 179.5(3)  | O(4)-Fe(3)-O(3)   | 81.4(4)   |
| N(1)-Fe(1)-Br(1) | 92.7(3)   | O(6)-Fe(3)-O(3)   | 78.9(4)   |
| N(2)-Fe(1)-Br(1) | 92.7(3)   | O(5)-Fe(3)-O(3)   | 79.5(4)   |
| N(3)-Fe(1)-Br(1) | 91.0(3)   | O(4)-Fe(3)-Br(2)  | 104.2(3)  |
| N(4)-Fe(1)-Br(1) | 88.6(3)   | O(6)-Fe(3)-Br(2)  | 98.9(3)   |
| O(1)-Fe(2)-O(2a) | 96.5(4)   | O(5)-Fe(3)-Br(2)  | 97.7(3)   |
| O(1)-Fe(2)-O(3a) | 164.2(4)  | O(3)-Fe(3)-Br(2)  | 174.5(3)  |
| O(9)-Fe(4)-O(10) | 79.4(4)   | O(8b)-Fe(5)-O(7)  | 96.6(4)   |
| O(9)-Fe(4)-N(6)  | 142.0(4)  | O(8b)-Fe(5)-O(9b) | 92.7(4)   |
| O(10)-Fe(4)-N(6) | 87.5(4)   | O(7)-Fe(5)-O(9b)  | 164.7(4)  |
| O(9)-Fe(4)-N(5)  | 143.9(4)  | O(8b)-Fe(5)-O(9)  | 165.8(4)  |

|                   |          |                    |          |
|-------------------|----------|--------------------|----------|
| O(10)-Fe(4)-N(5)  | 89.1(4)  | O(7)-Fe(5)-O(9)    | 91.5(4)  |
| N(6)-Fe(4)-N(5)   | 70.2(5)  | O(9b)-Fe(5)-O(9)   | 82.0(4)  |
| O(9)-Fe(4)-N(7)   | 77.1(4)  | O(8b)-Fe(5)-O(11)  | 90.2(4)  |
| O(10)-Fe(4)-N(7)  | 89.8(4)  | O(7)-Fe(5)-O(11)   | 90.8(4)  |
| N(6)-Fe(4)-N(7)   | 138.8(5) | O(9b)-Fe(5)-O(11)  | 101.3(4) |
| N(5)-Fe(4)-N(7)   | 68.6(5)  | O(9)-Fe(5)-O(11)   | 77.9(4)  |
| O(9)-Fe(4)-N(8)   | 76.9(4)  | O(8b)-Fe(5)-O(12b) | 89.5(4)  |
| O(10)-Fe(4)-N(8)  | 91.6(4)  | O(7)-Fe(5)-O(12b)  | 89.6(4)  |
| N(6)-Fe(4)-N(8)   | 67.9(4)  | O(9b)-Fe(5)-O(12b) | 78.4(4)  |
| N(5)-Fe(4)-N(8)   | 138.1(5) | O(9)-Fe(5)-O(12b)  | 102.3(4) |
| N(7)-Fe(4)-N(8)   | 153.3(4) | O(11)-Fe(5)-O(12b) | 179.5(4) |
| O(9)-Fe(4)-Br(3)  | 103.2(3) | O(8b)-Fe(5)-O(7)   | 96.6(4)  |
| O(10)-Fe(4)-Br(3) | 177.2(3) | O(8b)-Fe(5)-O(9b)  | 92.8(4)  |
| N(6)-Fe(4)-Br(3)  | 91.0(3)  | O(7)-Fe(5)-O(9b)   | 164.7(4) |
| N(5)-Fe(4)-Br(3)  | 88.2(3)  | O(8b)-Fe(5)-O(9)   | 165.8(4) |
| N(7)-Fe(4)-Br(3)  | 89.8(3)  | O(7)-Fe(5)-O(9)    | 91.5(4)  |
| N(8)-Fe(4)-Br(3)  | 89.9(3)  | O(9b)-Fe(5)-O(9)   | 82.0(4)  |
| O(12)-Fe(6)-O(11) | 108.5(4) | O(10)-Fe(6)-O(9)   | 78.2(4)  |
| O(12)-Fe(6)-O(10) | 122.6(4) | O(12)-Fe(6)-Br(4)  | 101.0(3) |
| O(11)-Fe(6)-O(10) | 118.7(4) | O(11)-Fe(6)-Br(4)  | 102.0(3) |
| O(12)-Fe(6)-O(9)  | 80.3(4)  | O(10)-Fe(6)-Br(4)  | 99.3(3)  |
| O(11)-Fe(6)-O(9)  | 79.4(4)  | O(9)-Fe(6)-Br(4)   | 177.6(3) |

Symmetry codes for **4**: a)  $-x+1, -y+3, -z$ ; b)  $-x, -y+4, -z-1$ .

**Table S4.** Selected bond lengths (Å) and angles (°) for **5**

|              |            |              |            |
|--------------|------------|--------------|------------|
| Fe(1)-O(1a)  | 2.1057(19) | Cl(1)-Fe(1d) | 2.7048(4)  |
| Fe(1)-O(3b)  | 2.1082(19) | Cl(1)-Fe(1e) | 2.7048(4)  |
| Fe(1)-N(1)   | 2.176(2)   | Cl(1)-Fe(1a) | 2.7048(4)  |
| Fe(1)-N(2)   | 2.186(2)   | O(1)-C(13)   | 1.292(3)   |
| Fe(1)-O(1)   | 2.3713(19) | O(1)-Fe(1d)  | 2.1057(19) |
| Fe(1)-O(3)   | 2.3726(19) | O(2)-C(13)   | 1.229(4)   |
| Fe(1)-Cl(1)  | 2.7048(4)  | O(3)-C(14)   | 1.282(4)   |
| Cl(1)-Fe(1b) | 2.7048(4)  | O(3)-Fe(1c)  | 2.1078(19) |
| Cl(1)-Fe(1c) | 2.7048(4)  |              |            |

---

|                     |            |                     |            |
|---------------------|------------|---------------------|------------|
| O(1a)-Fe(1)-O(3b)   | 156.93(8)  | Fe(1)-Cl(1)-Fe(1d)  | 89.914(12) |
| O(1a)-Fe(1)-N(1)    | 97.46(8)   | Fe(1c)-Cl(1)-Fe(1d) | 180.0      |
| O(3b)-Fe(1)-N(1)    | 100.72(8)  | Fe(1b)-Cl(1)-Fe(1e) | 89.914(12) |
| O(1a)-Fe(1)-N(2)    | 99.44(8)   | Fe(1)-Cl(1)-Fe(1e)  | 180.0      |
| O(3b)-Fe(1)-N(2)    | 99.29(8)   | Fe(1c)-Cl(1)-Fe(1e) | 89.914(12) |
| N(1)-Fe(1)-N(2)     | 73.34(9)   | Fe(1d)-Cl(1)-Fe(1e) | 90.086(12) |
| O(1a)-Fe(1)-O(1)    | 86.03(10)  | Fe(1b)-Cl(1)-Fe(1a) | 180.0      |
| O(3b)-Fe(1)-O(1)    | 87.30(7)   | Fe(1)-Cl(1)-Fe(1a)  | 89.914(12) |
| N(1)-Fe(1)-O(1)     | 69.11(8)   | Fe(1c)-Cl(1)-Fe(1a) | 90.086(12) |
| N(2)-Fe(1)-O(1)     | 142.45(8)  | Fe(1d)-Cl(1)-Fe(1a) | 89.914(12) |
| O(1a)-Fe(1)-O(3)    | 87.49(7)   | Fe(1e)-Cl(1)-Fe(1a) | 90.086(12) |
| O(3b)-Fe(1)-O(3)    | 86.79(2)   | C(13)-O(1)-Fe(1d)   | 124.45(17) |
| N(1)-Fe(1)-O(3)     | 142.21(8)  | C(13)-O(1)-Fe(1)    | 118.31(17) |
| N(2)-Fe(1)-O(3)     | 68.89(8)   | Fe(1d)-O(1)-Fe(1)   | 117.13(8)  |
| O(1)-Fe(1)-O(3)     | 148.66(7)  | C(14)-O(3)-Fe(1c)   | 123.96(18) |
| O(1a)-Fe(1)-Cl(1)   | 78.55(5)   | C(14)-O(3)-Fe(1)    | 118.67(18) |
| O(3b)-Fe(1)-Cl(1)   | 78.38(5)   | Fe(1c)-O(3)-Fe(1)   | 117.27(9)  |
| N(1)-Fe(1)-Cl(1)    | 143.49(7)  | C(1)-N(1)-C(5)      | 118.7(2)   |
| N(2)-Fe(1)-Cl(1)    | 143.15(6)  | C(1)-N(1)-Fe(1)     | 123.82(19) |
| O(1)-Fe(1)-Cl(1)    | 74.40(5)   | C(5)-N(1)-Fe(1)     | 117.40(19) |
| O(3)-Fe(1)-Cl(1)    | 74.26(5)   | C(10)-N(2)-C(6)     | 118.3(2)   |
| Fe(1b)-Cl(1)-Fe(1)  | 90.086(12) | C(10)-N(2)-Fe(1)    | 123.97(19) |
| Fe(1b)-Cl(1)-Fe(1c) | 89.914(12) | C(6)-N(2)-Fe(1)     | 117.76(19) |
| Fe(1)-Cl(1)-Fe(1c)  | 90.086(12) | Fe(1)-Cl(1)-Fe(1d)  | 89.914(12) |
| Fe(1b)-Cl(1)-Fe(1d) | 90.086(12) | Fe(1c)-Cl(1)-Fe(1d) | 180.0      |

---

Symmetry codes for **5**: a)  $-y+1, x-y-1, z$ ; b)  $y+1, -x+y+1, -z+2$ ; c)  $x-y, x-1, -z+2$ ; d)  $-x+y+2, -x+1, z$ ; e)  $-x+2, -y, -z+2$ .
